# Supplementary material
Source: PubMed Central journal article supplement (PMC2572789)
Supplement: blood-2008-03-144766_2.pdf [file blood-2008-03-144766_2.pdf]

| Human Gene   | Forward Primer 5'→3'               | Reverse Primer 5'→3'          | Amplicon size | Annealing temp, °C |
|--------------|------------------------------------|-------------------------------|---------------|--------------------|
| <i>ACTIN</i> | gca cag age ctc gcc ttt            | gga atc ctt ctg acc cat gc    | 213 bp        | 59-65°             |
| <i>TIE-2</i> | acc atc cac egg atc ctc            | ttg cca age ctc ata gtg att   | 252 bp        | 59-60°             |
| <i>AGTR1</i> | gca caa tgc ctg tag cca aa         | ccc tat cgg aag ggt tga at    | 164 bp        | 60°                |
| <i>AGTR2</i> | ggc aac aat gag tet acc t          | taa atc age cac age gag g     | 195 bp        | 60°                |
| <i>AGTN</i>  | aca ccg aag aca agt tga gg         | ggg gca gtt ctt gtc ctt cc    | 230 bp        | 59-60°             |
| <i>CDX2</i>  | cag cag cag cca cca cag            | gtg acg gtg ggg ttt age ac    | 176 bp        | 60-62°             |
| <i>EpoR</i>  | ccc ggg caa cta cag ctt            | ctg ctg tga cgc gca act       | 192 bp        | 60-61°             |
| <i>FLT3</i>  | gga atg tcc tca cac cta cca aa     | age ctg cgg aga gag tag cc    | 76 bp         | 60°                |
| <i>MLL</i>   | agg aga atg cag gca ctt tga        | cac aaa ctc tac atg ccc act a | 227 bp        | 60-61°             |
| <i>MPL</i>   | gaa gag gaa gag aaa aca aat<br>cca | gag atc tcc ctc cag tgc aag t | 203 bp        | 60°                |
| <i>RENIN</i> | gct ttc tca gcc agg aca tc         | tgg gag atg atg ttg tgc aa    | 181 bp        | 60°                |

1. Gene Abbr.: Angiotensin II receptor 1 (*AGTR1*), angiotensin II receptor 2 (*AGTR2*), angiotensinogen (*AGTN*), caudal 2 (*CDX2*), erythropoietin receptor (*EpoR*), FLT3 receptor (*FLT3*), Mixed lineage leukemia (*MLL*), and thrombopoietin receptor (*MPL*).

2. Primers for human-specific *CDX4*, *SCL*, *VWF* (von Willebrand factor), *VECAD* (*VE-cadherin*), *GATA1*, *PECAM1* (*CD31*), *KDR/flk-1*, *HOXB4*, *LMO2*, *GATA2*, *AML1 isoforms*, *C-MYB*, *PU.1*, and *MPL* (TPO receptor) genes have all been previously described.<sup>1</sup>

3. Primers for human-specific *RAG1* (recombinase activating gene 1), surrogate light chain genes *VpreB*, *λ5 chain*, and immunoglobulin heavy *Cμ chain* genes have been previously described.<sup>11</sup>
